# Supplementary material for: Characterization of secreted vesicles from vascular smooth muscle cells
Source: Royal Society of Chemistry journal article supplement (doi:10.1039/c3mb70544g), 2014-02-26
Supplement: c3mb70544g4.pdf [file c3mb70544g4.pdf]

**Table 4: Identified proteins in microvesicles from activated VSMCs**

| Paragon Score | %Cov(95) | Accession | Entry Name | Name                                                  | Peptides(95%) | Biological Processes | Cellular localizatio | SecretomeP | Exocarta |
|---------------|----------|-----------|------------|-------------------------------------------------------|---------------|----------------------|----------------------|------------|----------|
| 10            | 50,59    | P10668    | COF1_PIG   | Cofilin-1                                             | 5             | CA                   | Cyt /Nucleus         | Sec nc     | Exo      |
| 36,41         | 19,82    | P26234    | VINC_PIG   | Vinculin                                              | 20            | CA                   | Cyt /Membr           | NP         | Exo      |
| 29,45         | 36,91    | P79385    | MFGM_PIG   | Lactadherin                                           | 15            | CA                   | Sec/Membr            | Sec nc     |          |
| 2             | 4,619    | Q9GKE8    | CD47_PIG   | Leukocyte surface antigen CD47                        | 1             | CA                   | Membr                | Sec nc     |          |
| 24,29         | 19,05    | Q9GLP0    | ITB1_PIG   | Integrin beta-1                                       | 18            | CA                   | memb                 | NP         | Exo      |
| 2,96          | 3,432    | A5A8V7    | HS71L_PIG  | Heat shock 70 kDa protein 1-like                      | 2             | CH                   | Cyt                  | NP         | Exo      |
| 10,69         | 24,94    | P28491    | CALR_PIG   | Calreticulin                                          | 7             | CH                   | ER                   | NP         | Exo      |
| 6,33          | 18,7     | P34935    | GRP78_PIG  | 78 kDa glucose-regulated protein (Fragment)           | 4             | CH                   | ER                   | Sec nc     |          |
| 8,01          | 43,9     | P62936    | PPIA_PIG   | Peptidyl-prolyl cis-trans isomerase A                 | 5             | CH                   | Sec                  | NP         | Exo      |
| 7,75          | 6,965    | Q29092    | ENPL_PIG   | Endoplasmic reticulum protein                         | 4             | CH                   | ER                   | Sec c      |          |
| 2,01          | 2,991    | B6CVD7    | ERO1A_PIG  | ER 1-like protein alpha                               | 1             | CH/MP                | ER                   | Sec c      | Exo      |
| 2             | 12,38    | P82460    | THIO_PIG   | Thioredoxin                                           | 1             | CH/MP                | Sec/Nucleus          | Sec nc     | Exo      |
| 8,04          | 20,76    | Q5S1U1    | HSPB1_PIG  | Heat shock protein beta-1                             | 4             | CH/MP                | Cyt /Nucleus         | Sec nc     | Exo      |
| 1,44          | 2,771    | P29797    | GNAS_PIG   | Guanine nucleotide-binding protein G(s) subunit alpha | 1             | CS                   | Membr                | Sec nc     |          |
| 1,49          | 2,449    | P37176    | EGLN_PIG   | Endoglin                                              | 1             | CS                   | Membr                | Sec c      | Exo      |
| 2             | 8,901    | Q007T2    | CDC42_PIG  | Cell division control protein 42 homolog              | 1             | CS                   | Membr                | Sec nc     |          |
| 2,03          | 4,493    | Q6RVA9    | CAV1_PIG   | Caveolin-1                                            | 1             | CS                   | Golgi                | Sec nc     | Exo      |
| 1,28          | 6,859    | A0PFK7    | CAPZB_PIG  | F-actin-capping protein subunit beta                  | 2             | Cyt Org              | Cyt                  | Sec nc     |          |
| 16,36         | 25,69    | P02540    | DESM_PIG   | Desmin                                                | 17            | Cyt Org              | Cyt                  | Sec nc     |          |
| 82,65         | 74,88    | P02543    | VIME_PIG   | Vimentin                                              | 61            | Cyt Org              | Cyt                  | Sec nc     | Exo      |
| 14,52         | 28,09    | P02554    | TBB_PIG    | Tubulin beta chain                                    | 8             | Cyt Org              | Cyt                  | Sec nc     | Exo      |
| 2             | 30,95    | P21753    | TYB10_PIG  | Thymosin beta-10                                      | 1             | Cyt Org              | Cyt                  | Sec nc     |          |
| 22,5          | 17,49    | P26042    | MOES_PIG   | Moesin                                                | 13            | Cyt Org              | Cyt /Membr           | Sec nc     | Exo      |
| 6             | 22,66    | P29269    | MYL9_PIG   | Myosin regulatory light                               | 3             | Cyt Org              | Cyt                  | Sec nc     |          |

|       |       |        |           |                                                      |    |           |              |        |     |
|-------|-------|--------|-----------|------------------------------------------------------|----|-----------|--------------|--------|-----|
|       |       |        |           | polypeptide 9                                        |    |           |              |        |     |
| 17,6  | 32,39 | P42639 | TPM1_PIG  | Tropomyosin alpha-1 chain                            | 10 | Cyt Org   | Cyt          | Sec nc | Exo |
| 12,01 | 50,98 | P60662 | MYL6_PIG  | Myosin light polypeptide 6                           | 7  | Cyt Org   | Cyt          | NP     |     |
| 15,69 | 40,72 | P67937 | TPM4_PIG  | Tropomyosin alpha-4 chain                            | 9  | Cyt Org   | Cyt          | NP     | Exo |
| 38,26 | 53,04 | P68137 | ACTS_PIG  | Actin, alpha skeletal muscle                         | 40 | Cyt Org   | Cyt          | Sec nc | Exo |
| 2     | 4,713 | Q08092 | CNN1_PIG  | Calponin-1                                           | 1  | Cyt Org   | Cyt          | Sec nc |     |
| 2     | 3,497 | Q29221 | CAZA2_PIG | F-actin-capping protein subunit alpha-2              | 1  | Cyt Org   | Cyt          | NP     |     |
| 6,02  | 16,62 | Q2XVP4 | TBA1B_PIG | Tubulin alpha-1B chain                               | 5  | Cyt Org   | Cyt          | NP     | Exo |
| 35,76 | 47,99 | Q6QAQ1 | ACTB_PIG  | Actin, cytoplasmic 1                                 | 37 | Cyt Org   | Cyt          | NP     | Exo |
| 16,68 | 31,52 | Q767L7 | TBB5_PIG  | Tubulin beta chain                                   | 9  | Cyt Org   | Cyt          | Sec nc | Exo |
| 2,21  | 31,81 | Q95274 | TYB4_PIG  | Thymosin beta-4                                      | 1  | Cyt Org   | Cyt          | Sec nc |     |
| 4,74  | 5,026 | O02668 | ITIH2_PIG | Inter-alpha-trypsin inhibitor heavy chain H2         | 5  | ECM & rel | Sec          | Sec c  | Exo |
| 10,04 | 5,296 | P15145 | AMPN_PIG  | Aminopeptidase N                                     | 5  | ECM & rel | Membr        | sec c  |     |
| 3,49  | 14    | P20112 | SPRC_PIG  | SPARC                                                | 3  | ECM & rel | ECM/Sec      | Sec c  | Exo |
| 6     | 35,55 | Q49I35 | LEG1_PIG  | Galectin-1                                           | 4  | ECM & rel | ECM          | NP     |     |
| 8,01  | 7,647 | D2WKD8 | AT1A2_PIG | Sodium/potassium-transporting ATPase subunit alpha-2 | 5  | HK        | Membr        | Sec nc |     |
| 28,64 | 15,18 | P05024 | AT1A1_PIG | Sodium/potassium-transporting ATPase subunit alpha-1 | 15 | HK        | Membr        | Sec nc |     |
| 4     | 35,64 | P0CG68 | UBC_PIG   | Polyubiquitin-C                                      | 2  | HK        | Cyt /Nucleus | NP     |     |
| 2,38  | 25    | P46405 | RS12_PIG  | 40S ribosomal protein S12                            | 2  | HK        | Cyt          | Sec nc |     |
| 4     | 22,66 | P63053 | RL40_PIG  | Ubiquitin-60S ribosomal protein L40                  | 2  | HK        | Cyt /Nucleus | Sec nc |     |
| 4     | 26,96 | Q29315 | RLA2_PIG  | 60S acidic ribosomal protein P2                      | 3  | HK        | Cyt          | NP     |     |
| 4,02  | 11,28 | Q29371 | TPIS_PIG  | Triosephosphate isomerase                            | 2  | HK        | Mito         | NP     | Exo |
| 0,46  | 0,913 | A8I499 | CTR2_PIG  | Low affinity cationic amino acid transporter 2       | 1  | HK/MP     | Membr        | Sec nc |     |
| 6,13  | 12,9  | P00355 | G3P_PIG   | Glyceraldehyde-3-phosphate dehydrogenase             | 4  | HK/MP     | Cyt /Nucleus | Sec nc |     |

|       |       |        |           |                                                                              |    |         |              |        |     |
|-------|-------|--------|-----------|------------------------------------------------------------------------------|----|---------|--------------|--------|-----|
| 10,27 | 16,58 | P20303 | GTR1_PIG  | Solute carrier family 2, facilitated glucose transporter member 1 (Fragment) | 7  | HK/MP   | Membr        | NP     | Exo |
| 1,78  | 2,13  | P23220 | AT2B1_PIG | Plasma membrane calcium-transporting ATPase 1                                | 2  | HK/MP   | Membr        | NP     |     |
| 6,01  | 10,59 | Q1KYT0 | ENOB_PIG  | Beta-enolase                                                                 | 3  | HK/MP   | Cyt          | NP     | Exo |
| 2     | 2,993 | P00336 | LDHB_PIG  | L-lactate dehydrogenase B chain                                              | 1  | MP      | Cyt          | Sec nc |     |
| 2,01  | 3,012 | P00339 | LDHA_PIG  | L-lactate dehydrogenase A chain                                              | 1  | MP      | Cyt          | Sec nc |     |
| 0,35  | 4,411 | P83686 | NB5R3_PIG | NADH-cytochrome b5 reductase 3 (Fragment)                                    | 1  | MP      | ER           | NP     |     |
| 4,31  | 10,94 | Q9MZ16 | VDAC1_PIG | Voltage-dependent anion-selective channel protein 1                          | 3  | MP      | Mito         | NP     | Exo |
| 2     | 2,576 | Q767L6 | FLOT1_PIG | Flotillin-1                                                                  | 1  | Vtra/CS | Membr        | NP     | Exo |
| 1,34  | 6,897 | P08132 | ANXA4_PIG | Annexin A4                                                                   | 2  | Vtraf   | Membr        | NP     | Exo |
| 26,4  | 39,87 | P19619 | ANXA1_PIG | Annexin A1                                                                   | 16 | Vtraf   | Cyt /Nucleus | Sec nc | Exo |
| 36,32 | 54,28 | P19620 | ANXA2_PIG | Annexin A2                                                                   | 22 | Vtraf   | ECM/Sec      | Sec nc | Exo |
| 2,01  | 4,188 | Q29101 | CXA1_PIG  | Gap junction alpha-1 protein                                                 | 1  | Vtraf   | Membr        | NP     |     |
| 2,13  | 2,472 | Q6Q7J2 | GDIB_PIG  | Rab GDP dissociation inhibitor beta                                          | 1  | Vtraf   | Cyt /Membr   | NP     |     |
| 4,05  | 15,6  | P01965 | HBA_PIG   | Hemoglobin subunit alpha                                                     | 2  |         | Plasma       | NP     |     |
| 4     | 14,29 | P02067 | HBB_PIG   | Hemoglobin subunit beta                                                      | 2  |         | Plasma       | NP     |     |
| 2     | 6,802 | P02101 | HBE_PIG   | Hemoglobin subunit epsilon                                                   | 1  |         | Plasma       | NP     |     |
| 2     | 6,848 | P04246 | HBT_PIG   | Hemoglobin subunit theta                                                     | 1  |         | Plasma       | NP     |     |
| 27,14 | 25,36 | P08835 | ALBU_PIG  | Serum albumin                                                                | 40 |         | Plasma       | Sec c  |     |
| 18,23 | 11,34 | P09571 | TRFE_PIG  | Serotransferrin                                                              | 14 |         | Sec          | Sec nc |     |
| 12,01 | 20,37 | P18648 | APOA1_PIG | Apolipoprotein A-I                                                           | 6  |         | Plasma       | Sec c  |     |
| 2,01  | 2,838 | P18650 | APOE_PIG  | Apolipoprotein E                                                             | 1  |         | Sec          | Sec c  |     |
| 2,84  | 11,4  | P50447 | A1AT_PIG  | Alpha-1-antitrypsin                                                          | 6  |         | Sec          | Sec c  |     |
| 2     | 5,156 | Q29549 | CLUS_PIG  | Clusterin                                                                    | 2  |         | ECM          | Sec c  | Exo |
| 13,89 | 13,77 | Q8MJ76 | FETA_PIG  | Alpha-fetoprotein                                                            | 14 |         | Plasma       | Sec c  |     |
| 7,86  | 3,675 | Q9GLP1 | FA5_PIG   | Coagulation factor V                                                         | 6  |         | Sec          | Sec c  |     |
